# Supplementary material for: High-contrast fluorescence sensing of aqueous Cu(i) with triarylpyrazoline probes: dissecting the roles of ligand donor strength and excited state proton transfer
Source: Royal Society of Chemistry journal article supplement (doi:10.1039/c2dt31985c), 2012-11-20
Supplement: c2dt31985c.pdf [file c2dt31985c.pdf]

## Supplementary Information for

# High-contrast fluorescence sensing of aqueous Cu(I) with triarylpyrazoline probes: Dissecting the roles of ligand donor strength and excited state proton transfer

M. Thomas Morgan, Pritha Bagchi, and Christoph J. Fahrni\*

*School of Chemistry and Biochemistry and Petit Institute for Bioengineering and Bioscience,  
Georgia Institute of Technology, 901 Atlantic Drive, Atlanta, Georgia 30332*

### Table of Contents

|                                                                      |        |
|----------------------------------------------------------------------|--------|
| 1. $^1\text{H}$ -NMR and $^{13}\text{C}$ -NMR Spectra                | S2-10  |
| 2. Time-resolved Fluorescence Decay Profiles                         | S11-13 |
| 3. Electrochemistry                                                  | S14    |
| 4. Determination of the Apparent Cu(I)-Affinity of Probe <b>1</b>    | S15    |
| 5. Determination of the Acid Dissociation Constant of Probe <b>1</b> | S17    |

**<sup>1</sup>H-NMR (CD<sub>3</sub>OD, 400 MHz)**

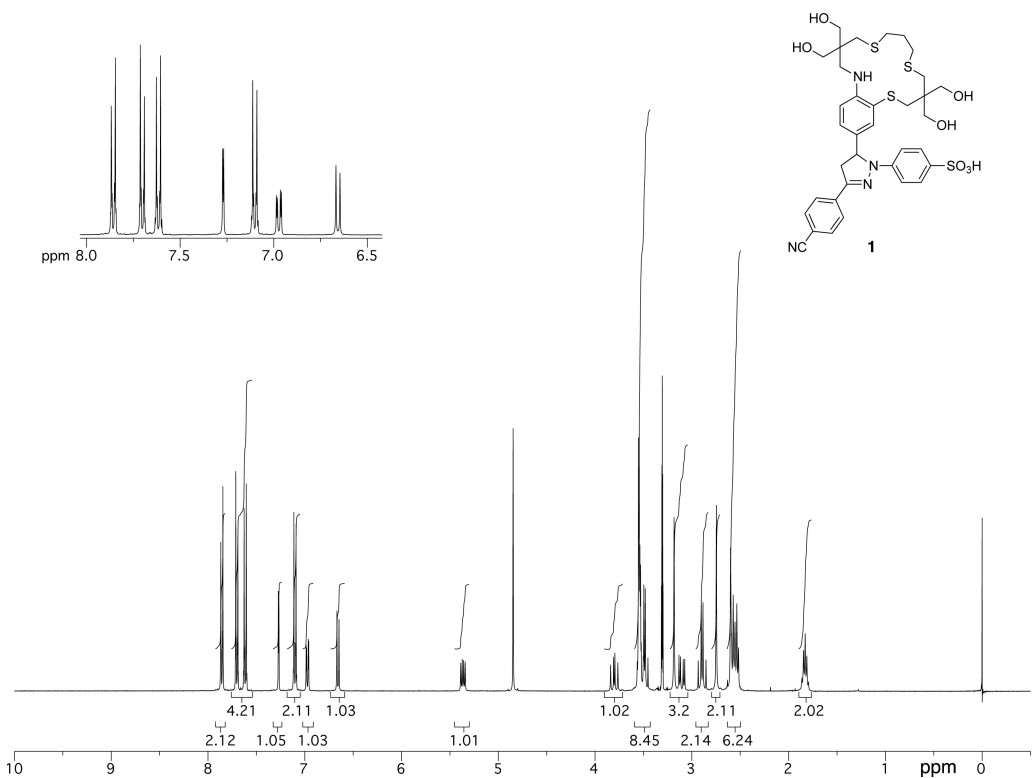

**<sup>13</sup>C-NMR (CD<sub>3</sub>OD, 100 MHz)**

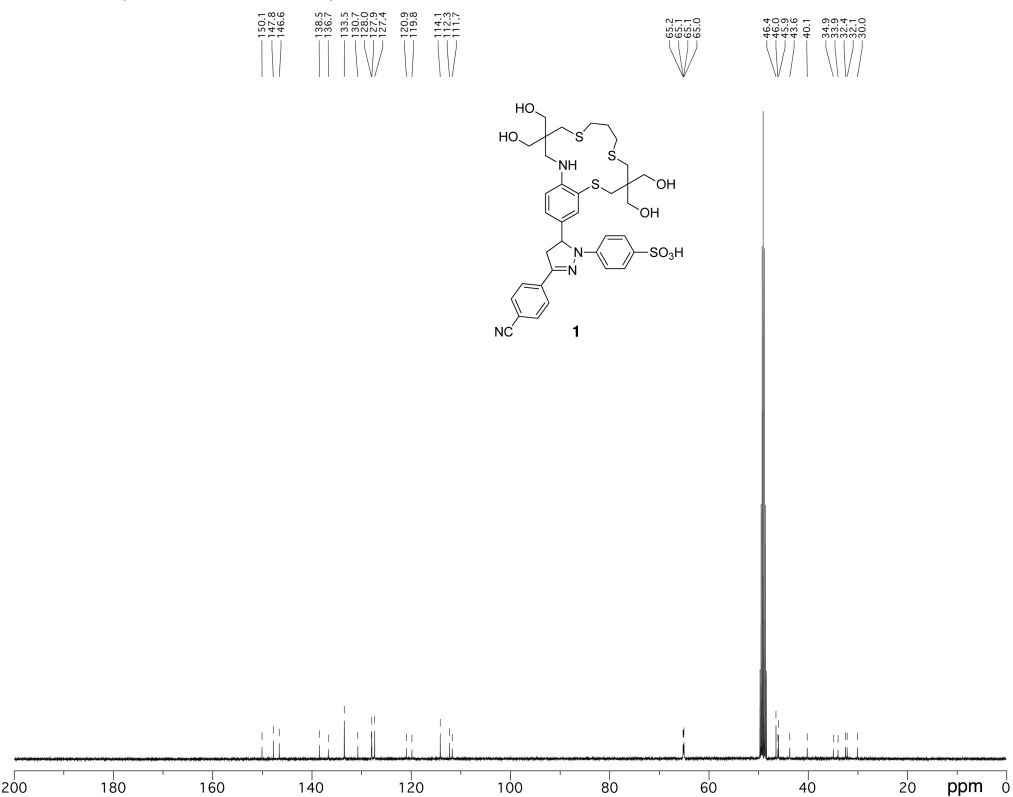

**<sup>1</sup>H-NMR (CDCl<sub>3</sub>, 400 MHz)**

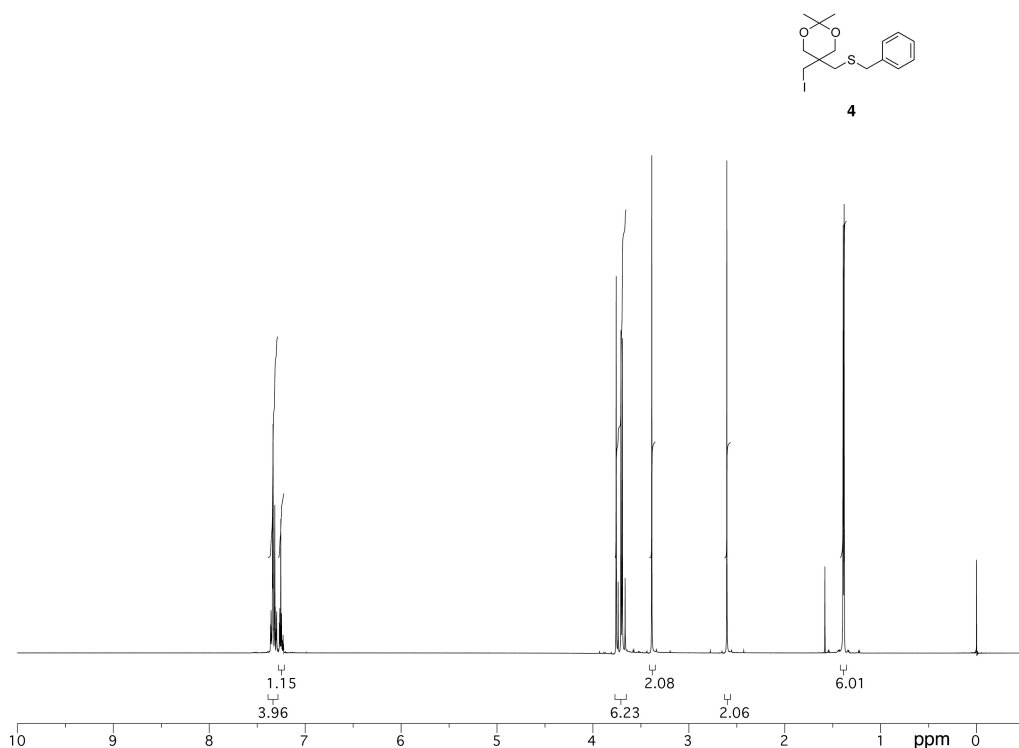

**<sup>13</sup>C-NMR (CDCl<sub>3</sub>, 100 MHz)**

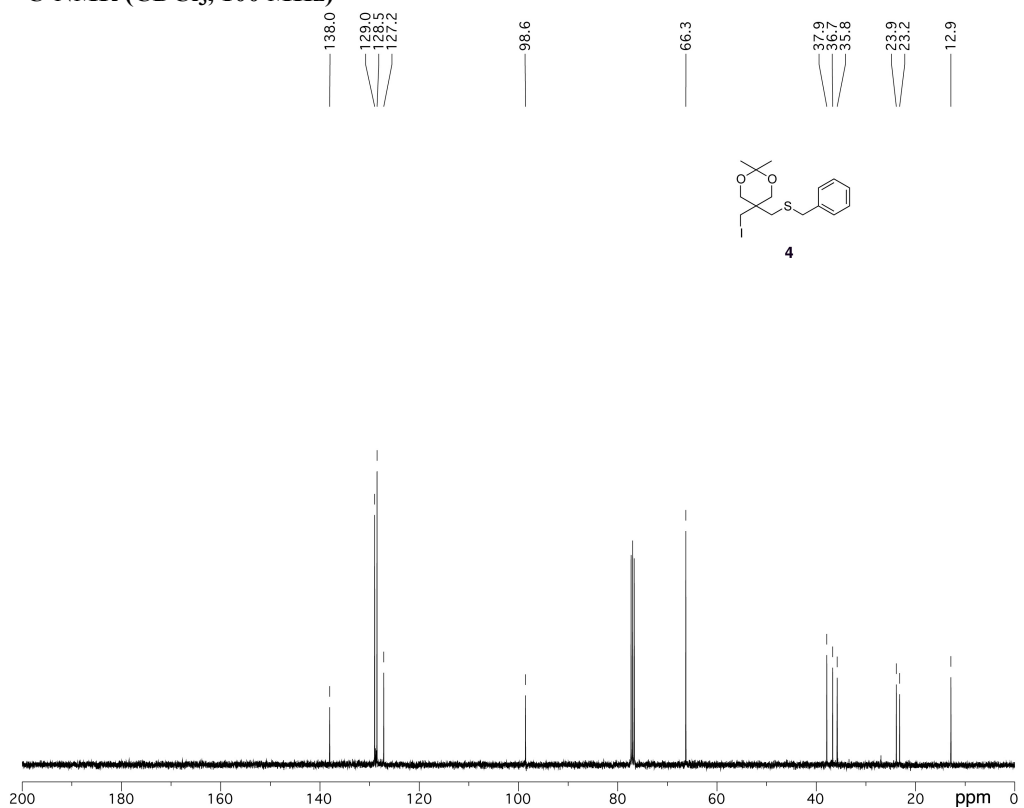

**<sup>1</sup>H-NMR (CDCl<sub>3</sub>, 400 MHz)**

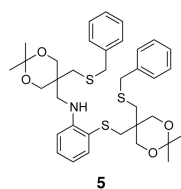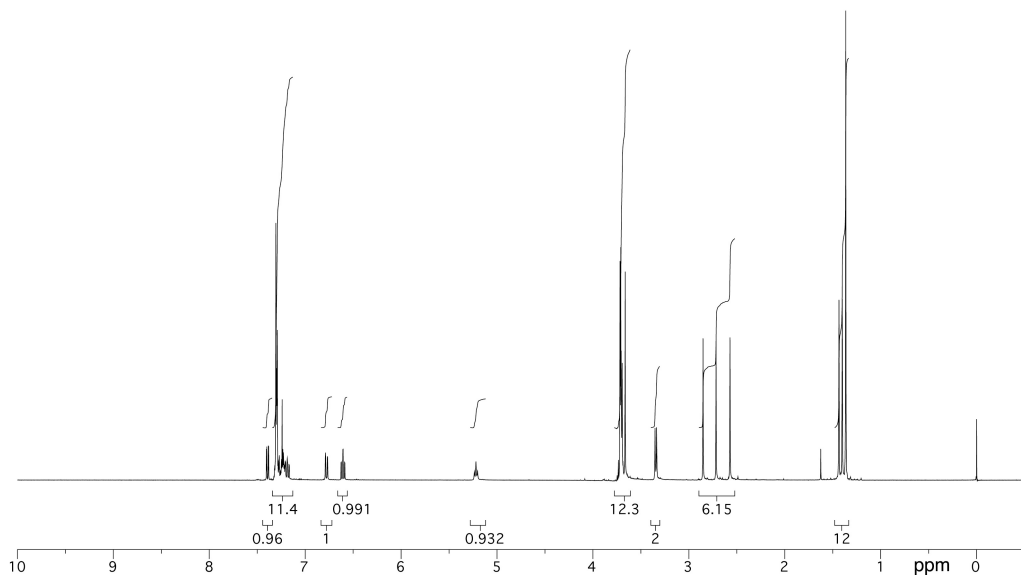

**<sup>13</sup>C-NMR (CDCl<sub>3</sub>, 100 MHz)**

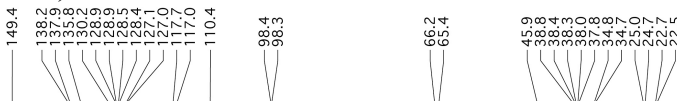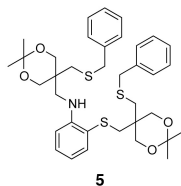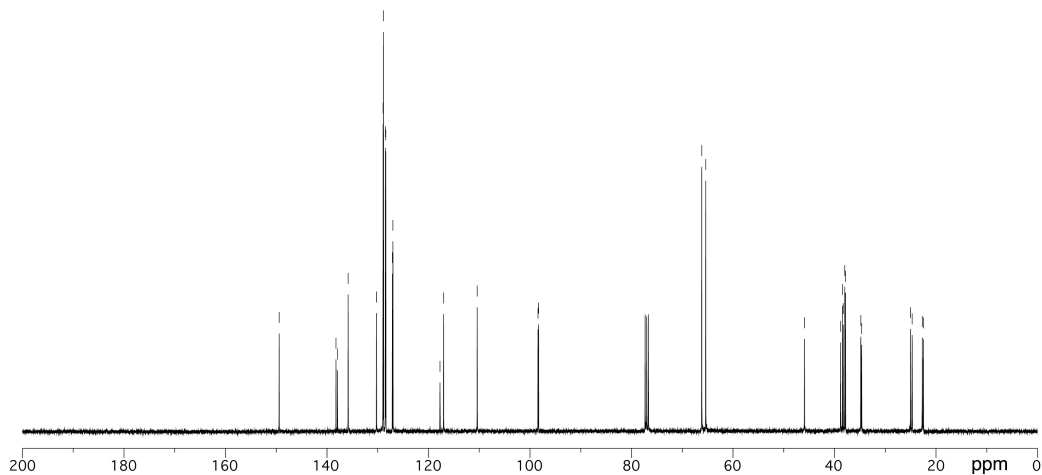



**<sup>1</sup>H-NMR (CDCl<sub>3</sub>, 400 MHz)**

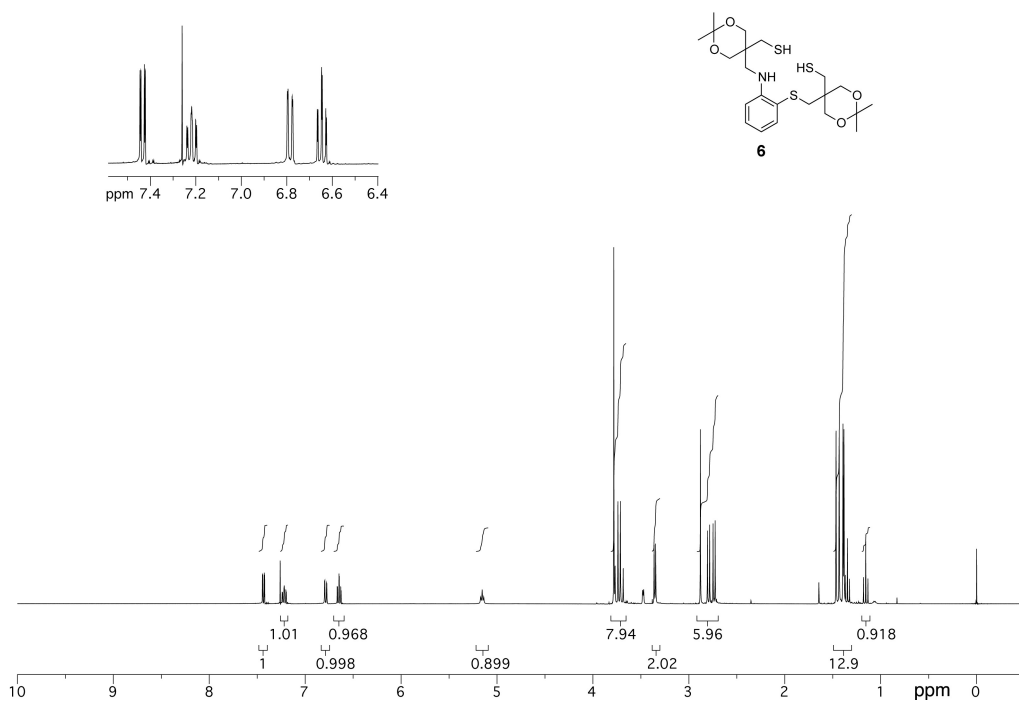

**<sup>13</sup>C-NMR (CDCl<sub>3</sub>, 100 MHz)**

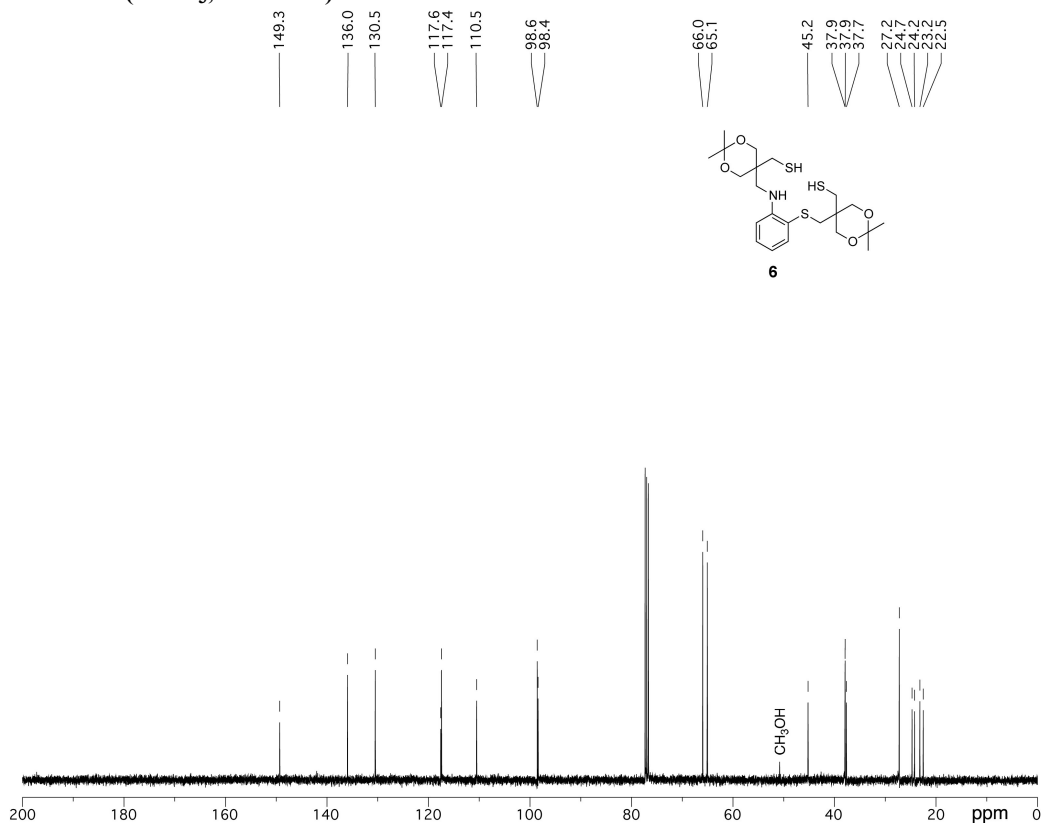

**<sup>1</sup>H-NMR (CDCl<sub>3</sub>, 400 MHz)**

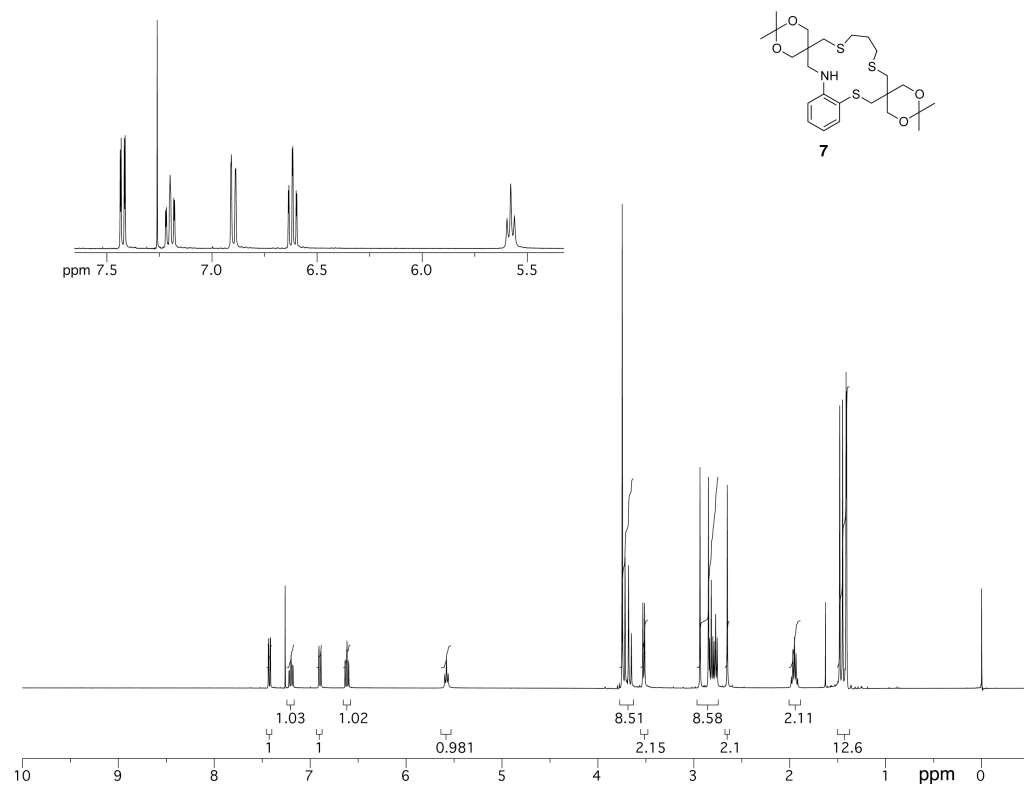

**<sup>13</sup>C-NMR (CDCl<sub>3</sub>, 100 MHz)**

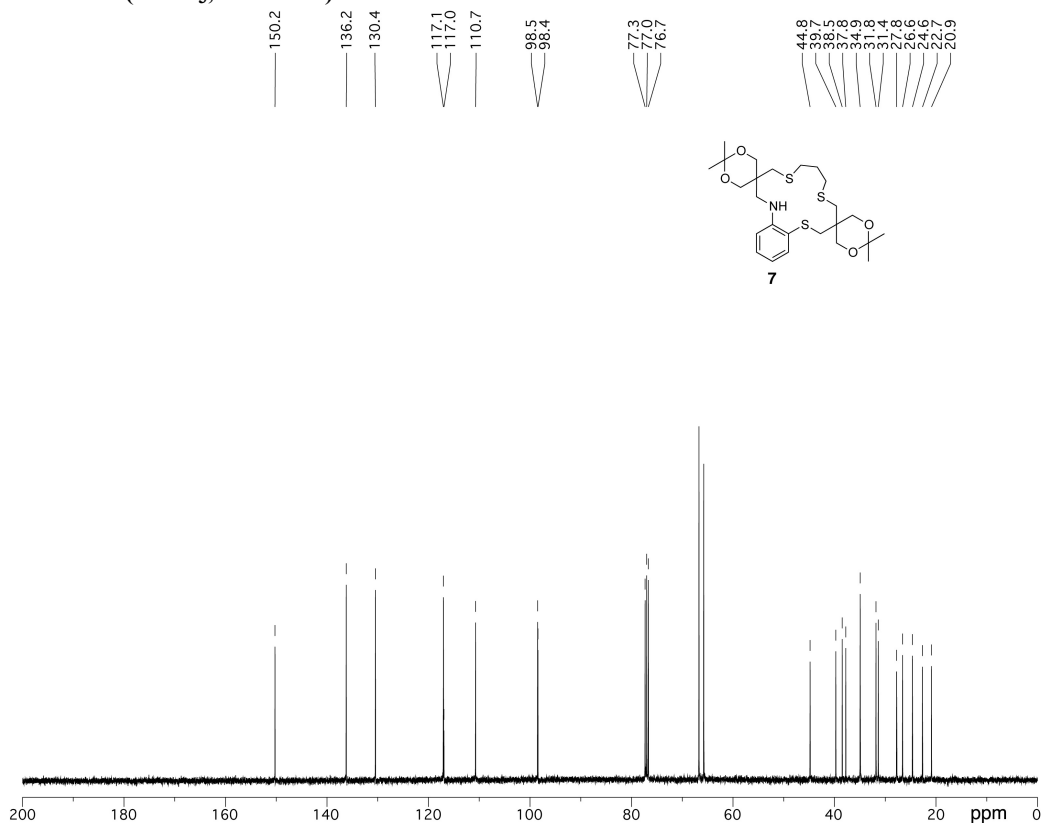

**<sup>1</sup>H-NMR (CDCl<sub>3</sub>, 400 MHz)**

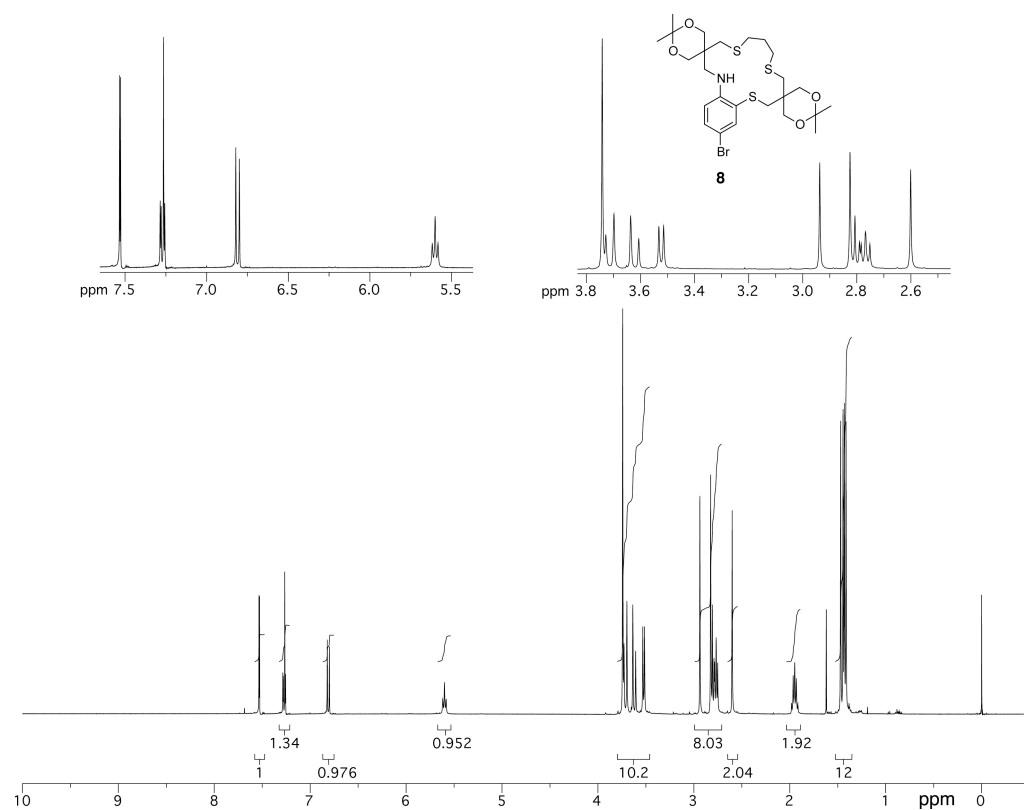

**<sup>13</sup>C-NMR (CDCl<sub>3</sub>, 100 MHz)**

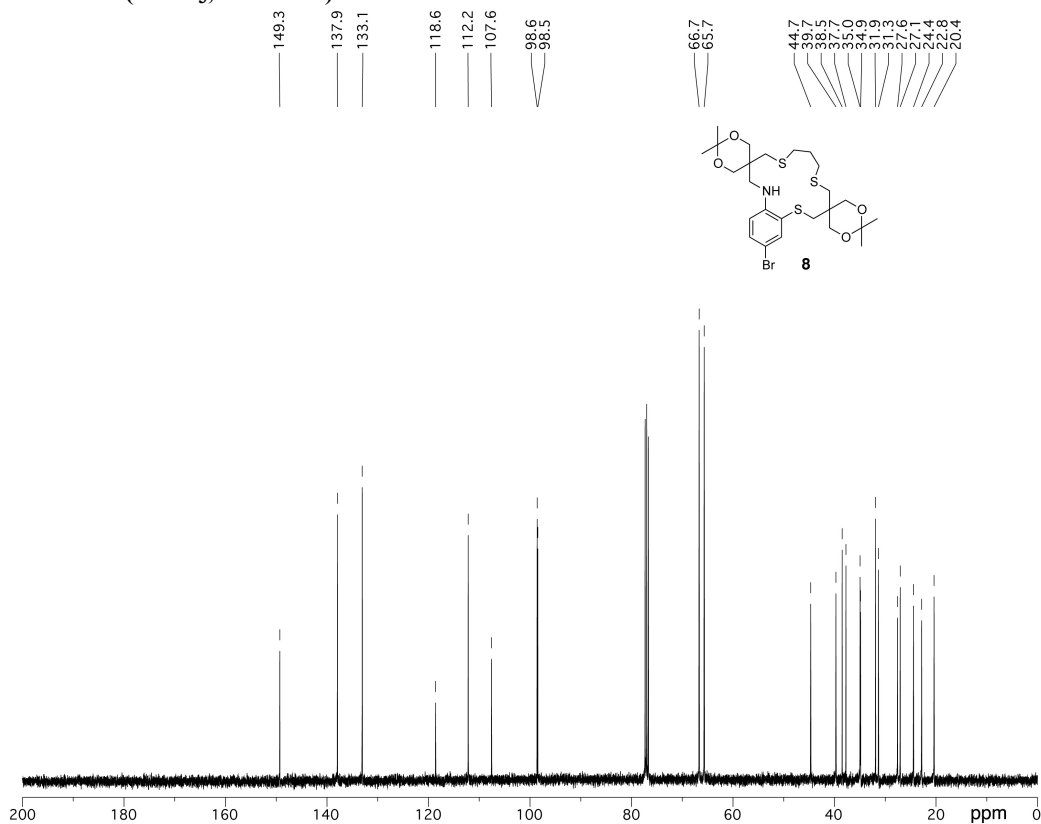

**<sup>1</sup>H-NMR (CDCl<sub>3</sub>, 400 MHz)**

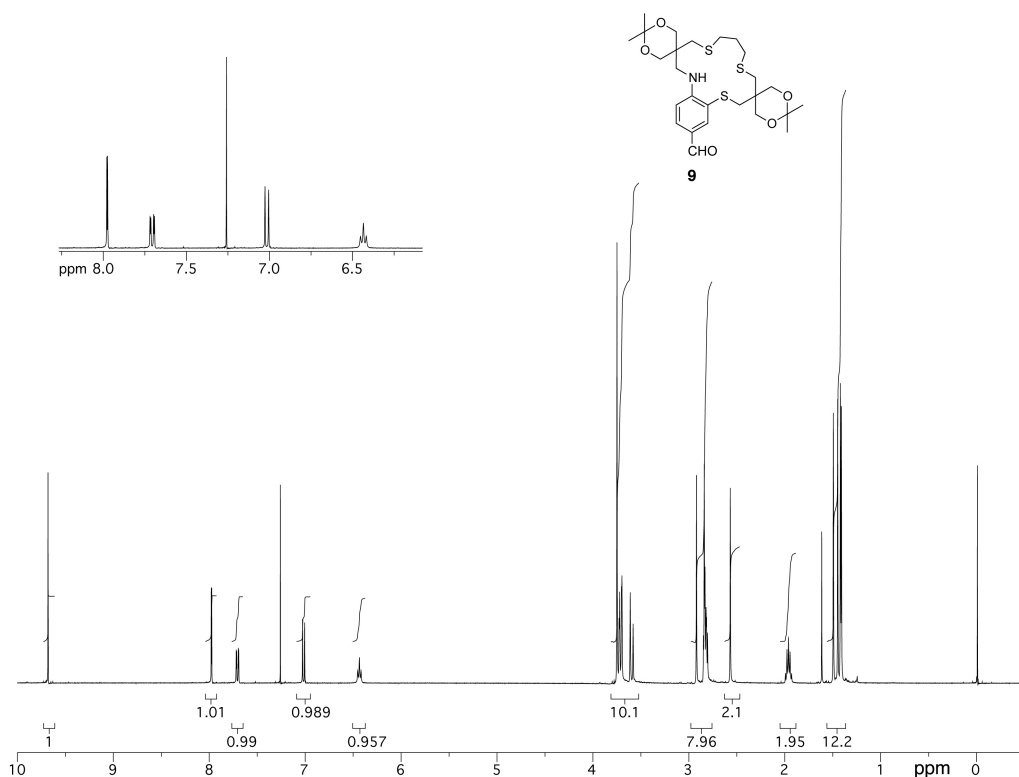

**<sup>13</sup>C-NMR (CDCl<sub>3</sub>, 100 MHz)**

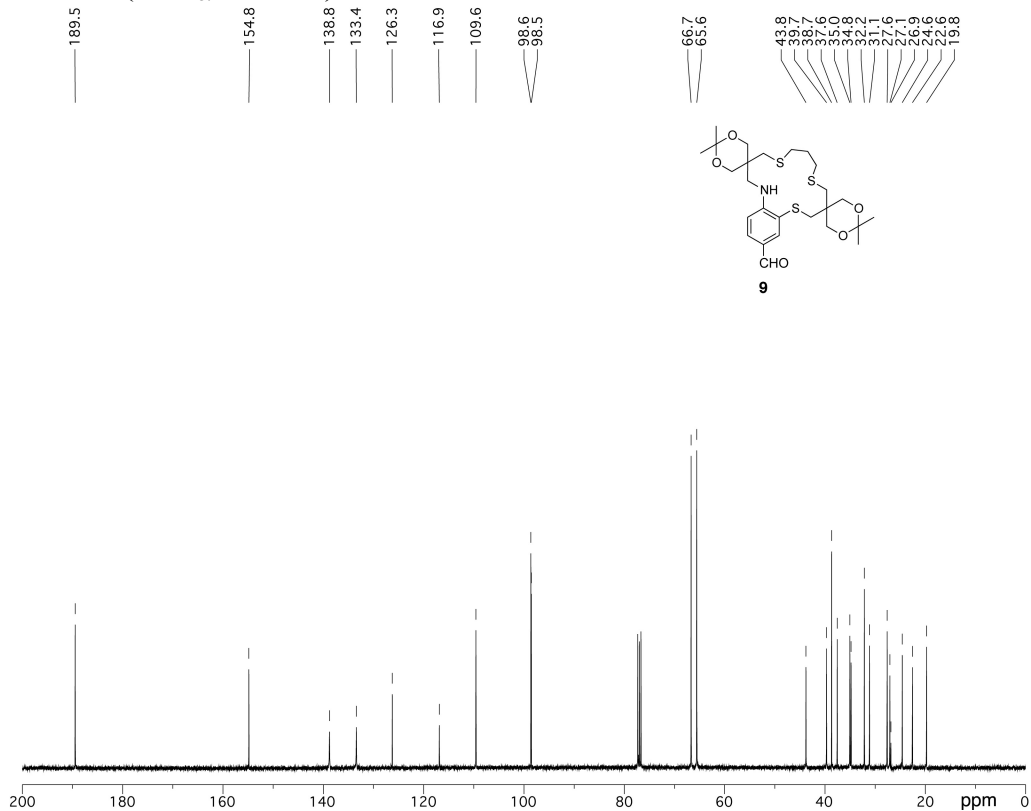

**<sup>1</sup>H-NMR (CDCl<sub>3</sub>, 400 MHz)**

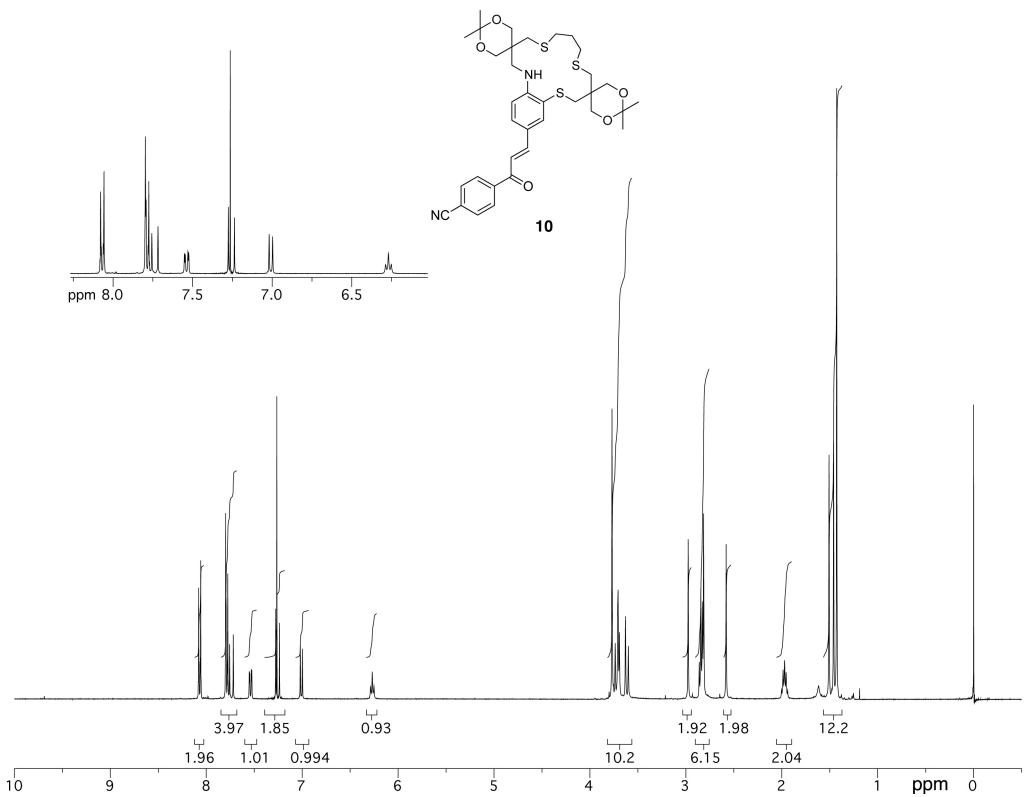

**<sup>13</sup>C-NMR (CDCl<sub>3</sub>, 100 MHz)**

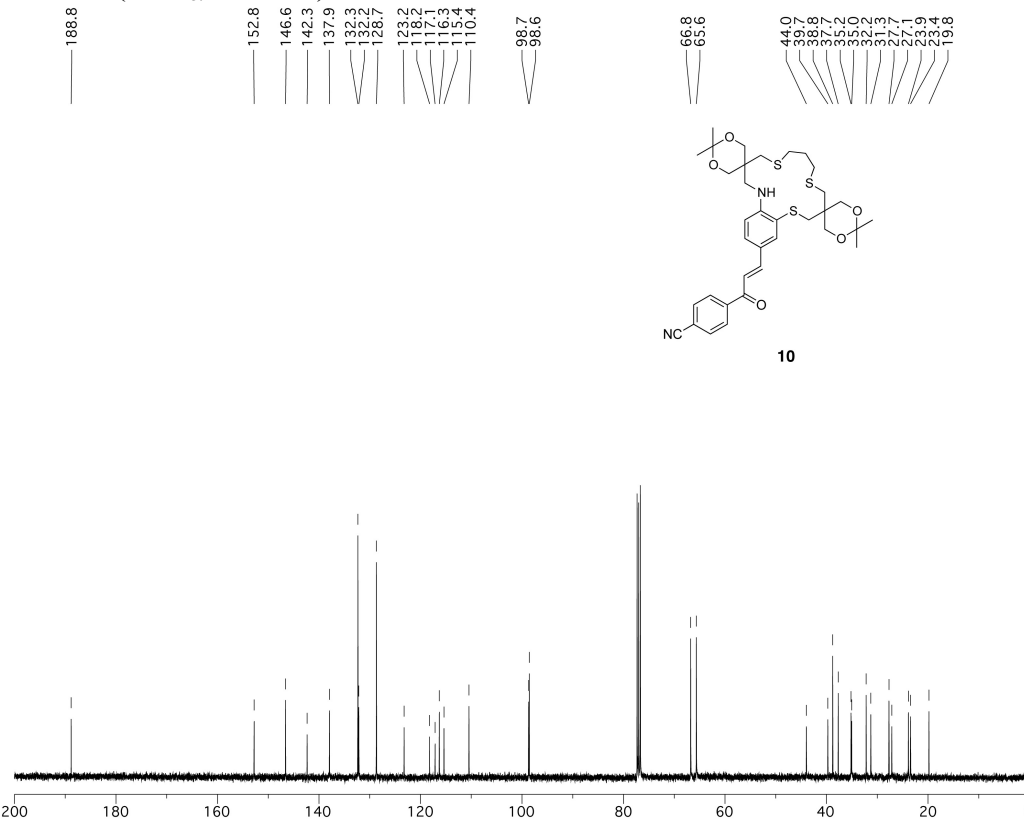

**<sup>1</sup>H-NMR (CD<sub>3</sub>OD, 2 M LiCl, 400 MHz)**

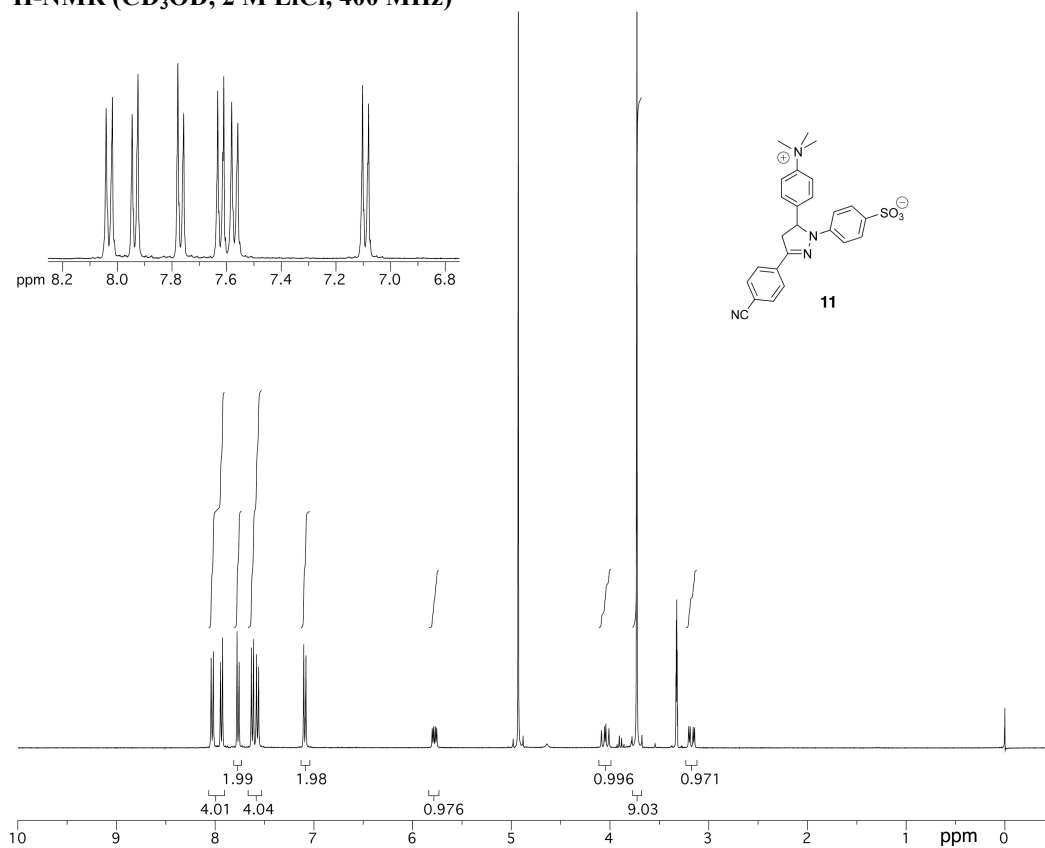

Note: the quartet near 3.8 ppm is due to residual 2,2,2-trifluoroethanol used as solvent in the preparation of **11**.

## 2. Time-resolved Fluorescence Emission Decay Data

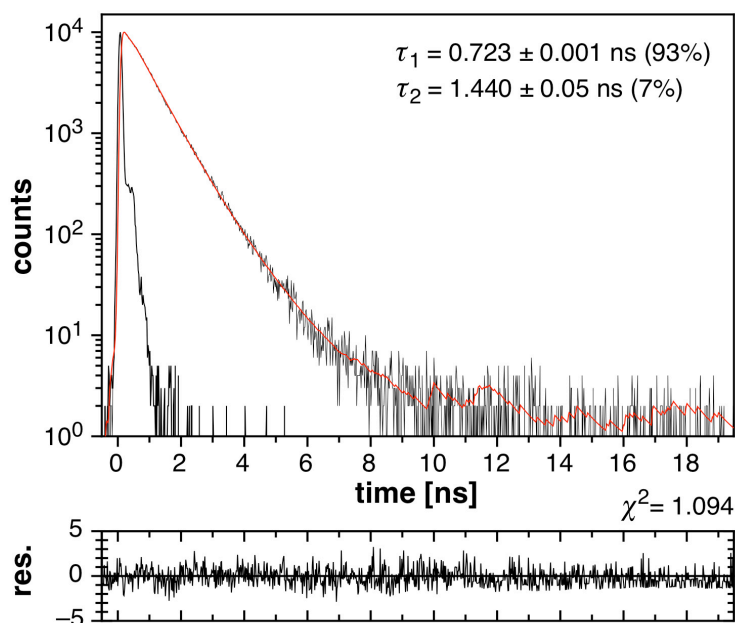

**Figure S1a:** Fluorescence decay profile for pyrazoline derivative **1** in aqueous buffer (10 mM MOPS/K<sup>+</sup>, pH 7.2) at 22 °C (IRF = instrument response function; curve fit for a biexponential decay shown as solid trace in red).

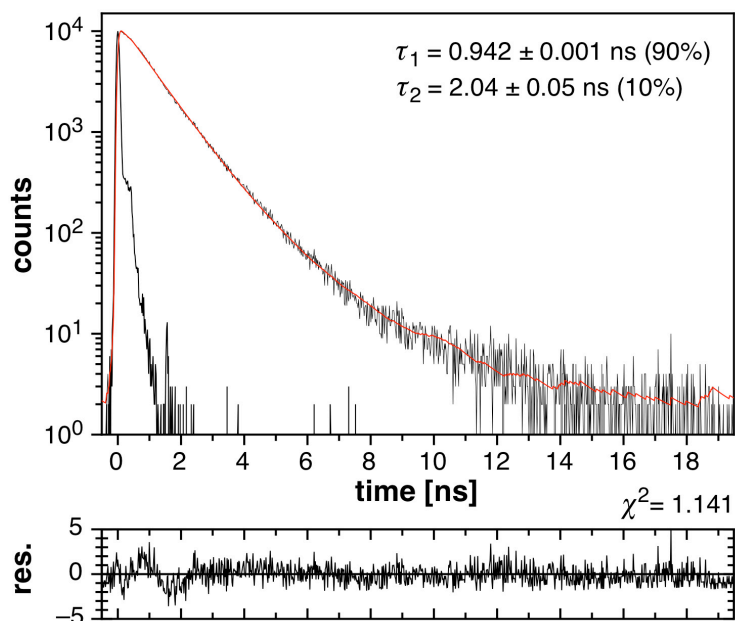

**Figure S1b:** Fluorescence decay profile for pyrazoline derivative **1** in D<sub>2</sub>O buffer (10 mM MOPS/K<sup>+</sup>, pH\* 7.3 in D<sub>2</sub>O corresponding to pH 7.2 in H<sub>2</sub>O) at 22 °C (IRF = instrument response function; curve fit for a biexponential decay shown as solid trace in red).

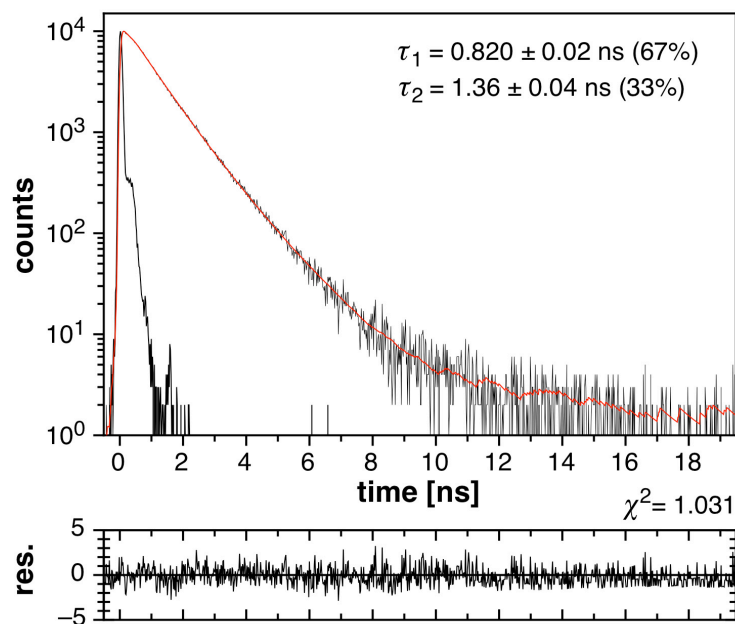

**Figure S2:** Fluorescence decay profile for pyrazoline derivative CTAP-2 in aqueous buffer (10 mM MOPS/K<sup>+</sup>, pH 7.2) at 22 °C (IRF = instrument response function; curve fit for a biexponential decay shown as solid trace in red).

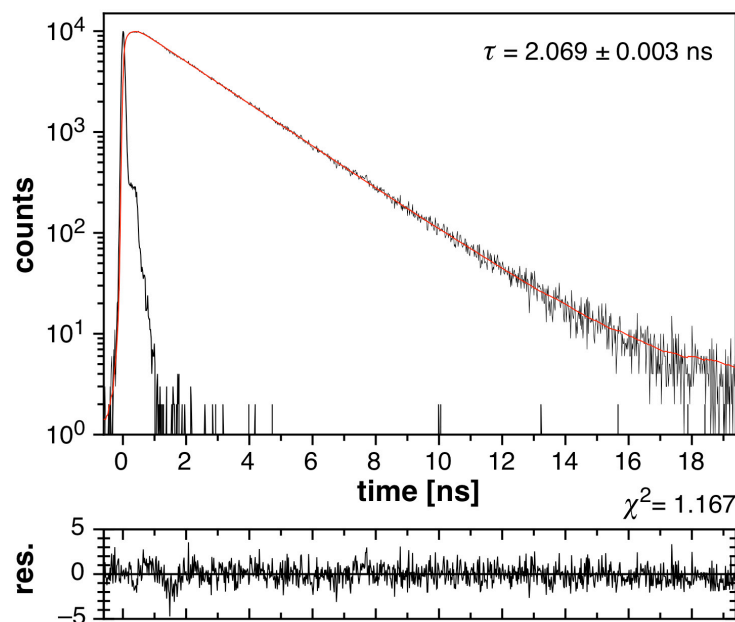

**Figure S3a:** Fluorescence decay profile for pyrazoline derivative **11** in water at 22 °C (IRF = instrument response function; curve fit for a monoexponential decay shown as solid trace in red).



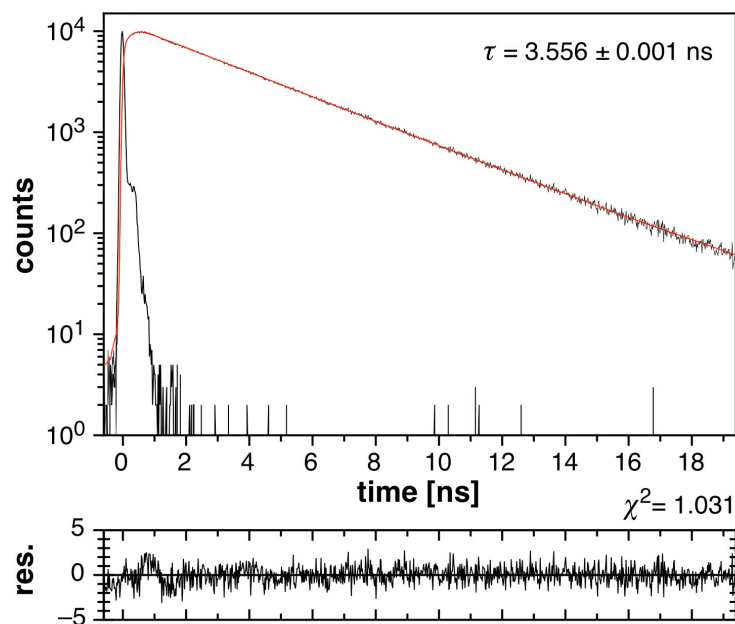

**Figure S3b:** Fluorescence decay profile for pyrazoline derivative **11** in D<sub>2</sub>O at 22 °C (IRF = instrument response function; curve fit for a monoexponential decay shown as solid trace in red).

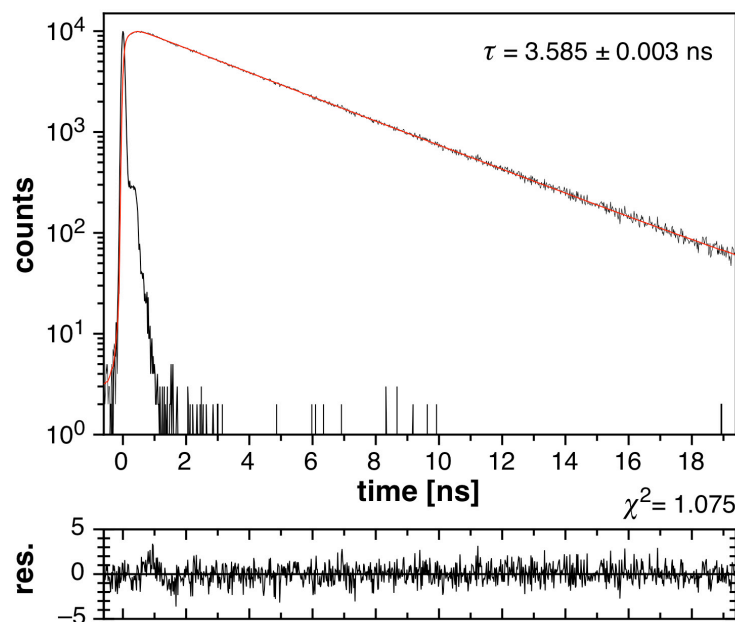

**Figure S3c:** Fluorescence decay profile for pyrazoline derivative **11** in MeOH at 22 °C (IRF = instrument response function; curve fit for a monoexponential decay shown as solid trace in red).

### 3. Electrochemistry

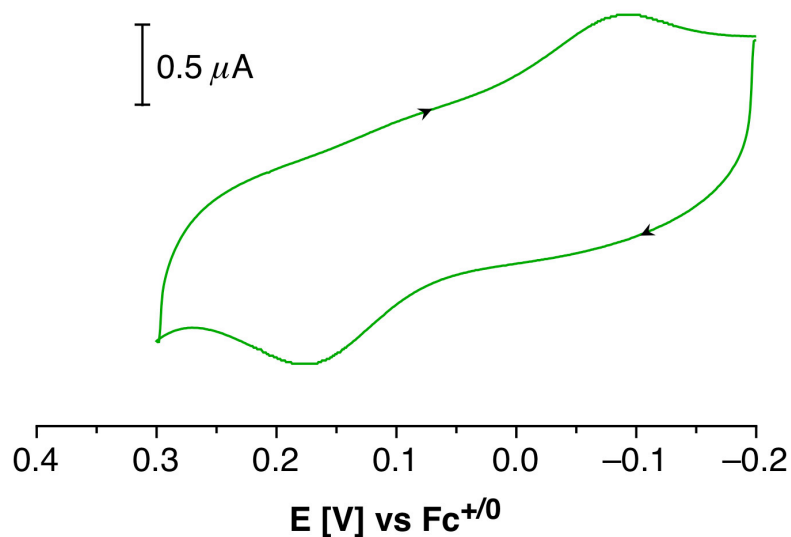

**Figure S4:** Cyclic voltammogram of **1** (70 μM) in the presence of 30 μM [Cu(I)(CH<sub>3</sub>CN)<sub>4</sub>]PF<sub>6</sub> at pH 5.0 under deoxygenated condition (10 mM PIPBS, 0.1 M KClO<sub>4</sub>, glassy carbon working electrode, Pt counter electrode, aqueous Ag/AgCl/1 M KCl reference electrode, scan rate 50 mV/s, direction indicated by black arrows). The voltammogram was referenced against the external Fc<sup>+/0</sup> potential measured under the same conditions.

#### 4. Determination of the Apparent Cu(I)-Affinity of Probe 1

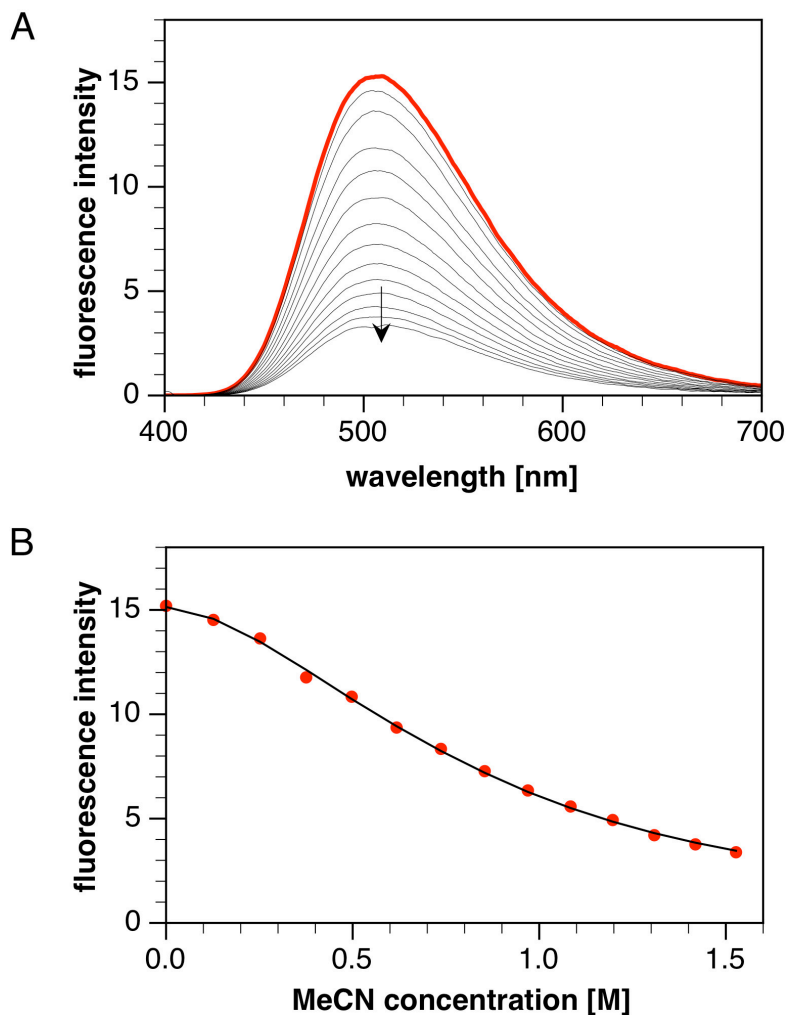

**Figure S5:** Fluorescence titration of pyrazoline **1** (5  $\mu$ M) with CH<sub>3</sub>CN in the presence of 3.6  $\mu$ M CuSO<sub>4</sub> and 50  $\mu$ M sodium ascorbate under deoxygenated condition in PIPBS buffer (50 mM, pH 5.0, 60 mM KClO<sub>4</sub>, 22°C). A) Fluorescence spectra acquired for  $c(\text{CH}_3\text{CN})$  ranging between 0 to 1.60 M. The red trace corresponds to the emission spectrum prior to addition of CH<sub>3</sub>CN. B) Fluorescence intensity change (red points) and curve fit (solid trace) for the titration (A) at a wavelength of 508 nm ( $\log K^{\text{Cu(I)}} = 9.71 \pm 0.02$ ).

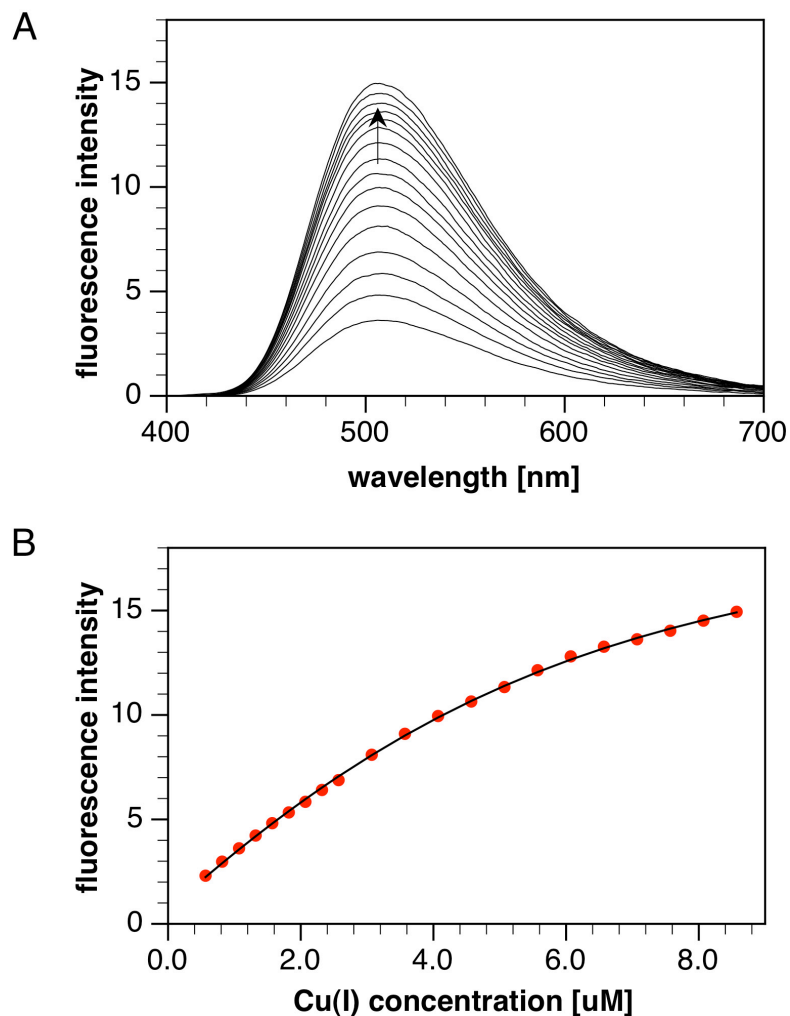

**Figure S6:** Fluorescence titration of pyrazoline **1** (5 μM) with CuSO<sub>4</sub> in the presence of 100 μM sodium ascorbate and constant CH<sub>3</sub>CN concentration of 0.70 M under deoxygenated condition in PIPBS buffer (50 mM, pH 5.0, 60 mM KClO<sub>4</sub>, 22°C). A) Fluorescence spectra acquired for c(Cu(II)) ranging between 0.56 to 8.56 μM. B) Fluorescence intensity change (red points) and curve fit (solid trace) for the titration (A) at a wavelength of 508 nm ( $\log K^{\text{Cu(I)}} = 9.74 \pm 0.03$ ).

## 5. Determination of the Acid Dissociation Constant of Probe 1

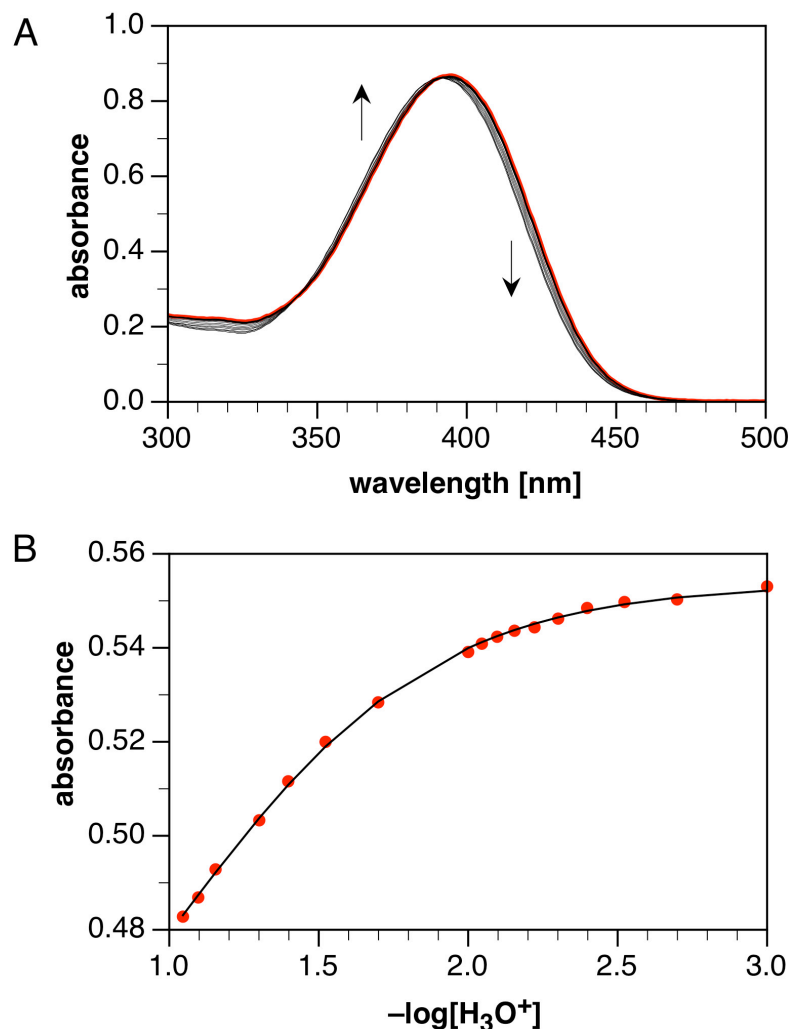

**Figure S7:** Titration of pyrazoline **1** with HCl at constant 0.1 M ionic strength. A) UV-vis spectra acquired for  $c(\text{HCl})$  ranging between 1 mM to 100 mM. The red trace corresponds to the UV-vis absorption spectrum at  $-\log[\text{H}_3\text{O}^+] = 3.0$ . B) Absorbance change (red points) and curve fit (solid trace) for the titration (A) at a wavelength of 419 nm ( $pK_a = 1.0 \pm 0.05$ ).
